# Supplementary material for: Highly active and stable Ru–(OH)-based catalysts supported on Ni–manganite for the base-free aerobic oxidation of 5-hydroxymethyl furfural to 2,5-furan dicarboxylic acid in a noble water–organic solvent system
Source: Royal Society of Chemistry journal article supplement (doi:10.1039/d3cy00887h), 2023-01-01
Supplement: d3cy00887h1.pdf [file d3cy00887h1.pdf]

**Highly Active and Stable Ru-(OH)-based Catalysts Supported on Ni-Manganite for the Base-free Aerobic Oxidation of 5-Hydroxymethyl Furfural to 2,5-Furan Dicarboxylic Acid in a Noble Water–organic Solvent System**

Bolla Srinivasa Rao <sup>a</sup>, Marcel Jonathan Hidajat <sup>a,b</sup>, Gwang-Nam Yun <sup>a,b,\*</sup> and Dong Won Hwang <sup>a,b,\*</sup>

<sup>a</sup> Green Carbon Research Center, Korea Research Institute of Chemical Technology (KRICT),  
141 Gajeongro, Yuseong, Daejeon, 34114, Republic of Korea

<sup>b</sup> Department of Advanced Materials and Chemical Engineering, University of Science and  
Technology (UST), 141 Gwahangno, Yuseong, Daejeon, 34114, Republic of Korea

\*Corresponding author

E-mail address: dwhwang@kRICT.re.kr (Dong Won Hwang), gnyun@kRICT.re.kr (Gwang-Nam Yun).

## 1. Experimental

### 1.1. Characterizations

The bulk phase and crystal structure of the synthesized catalysts were characterized by X-ray diffraction (XRD) with a scanning range of  $10^{\circ}$ – $80^{\circ}$  and a scanning rate of  $2^{\circ} \text{ min}^{-1}$ . The XRD analysis was performed using a Rigaku Ultima IV X-ray diffractometer (Rigaku, Japan) with a Cu K $\alpha$  radiation beam ( $\lambda = 0.15418 \text{ nm}$ ) operated at 45 kV and 200 mA. The surface areas of the catalysts were determined using an ASAP 2420 apparatus (Micromeritics, USA). The samples were degassed prior to analysis for 30 min at  $90^{\circ} \text{C}$ , followed by constant heating at  $300^{\circ} \text{C}$  for 4 h.

The surface species of the catalysts were characterized in *ex situ* condition using high-resolution X-ray photoelectron spectroscopy (XPS) (Axis Supra, Kratos Analytical Ltd, UK) equipped with a monochromatic Al K $\alpha$  source (1486.7 eV). The binding energy of the C<sub>1s</sub> bond (284.8 eV) was used as a reference for peak assignment. The catalyst was reduced in the H<sub>2</sub> environment at  $460^{\circ} \text{C}$  for 4 h and sealed in a glass vial prior to analysis.

Temperature-programmed reduction (TPR) was performed to observe the reduction behavior of the metals. The analysis was performed using Micromeritics AutoChem II 2920 (USA) equipped with a thermal conductivity detector at a heating rate of  $3^{\circ} \text{C min}^{-1}$  in a 10% H<sub>2</sub>/Ar atmosphere (flow rate =  $50 \text{ mL min}^{-1}$ ).

The CO-chemisorption analysis was performed using Micromeritics AutoChem II 2920 (USA). Before the CO adsorption, catalysts were reduced under H<sub>2</sub>/Ar flow at  $200^{\circ} \text{C}$  (473 K) for 60 min. followed by purging with helium for 30 min. The stoichiometry for adsorption of CO on surface metal atoms was assumed to be 1:1. For CO chemisorption experiment, the sample (~100 mg) was pretreated with hydrogen at  $200^{\circ} \text{C}$  (473 K) for 60 min, followed by purging with high-

purity helium for 30 min. After the sample was cooled down to 50 °C, a 5% CO/He mixture was injected into the reactor repeatedly until CO adsorption was saturated.

The dispersion of Ru was calculated from the amount of CO adsorbed by assuming the CO: Ru adsorption stoichiometry to be 1:1.

An O<sub>2</sub>-TPD process was performed on a Micromeritics Autochem II Chemisorption analyzer. Before analysis, the sample was pretreated for 30 minutes with helium at 200 °C. Then the sample was introduced to 5% O<sub>2</sub>/He mixture for 1 hour at 50 °C. The gas-phase O<sub>2</sub> was then purged with helium at 50 °C. Then the O<sub>2</sub> desorption was carried to 800 °C at the rate of 10 °C per minute in He flow.

X-ray absorption near-edge spectra (XANES) and extended X-ray absorption fine structure (EXAFS) spectra were measured on the 7D beamline located at the Pohang Accelerator Laboratory (PLS-II, 3 GeV, Korea). The Ru K-edge spectra (22.117 keV) of the reduced catalyst samples were recorded at 25–27 °C in transmission mode. The energy was calibrated using a standard metal foil. The data were analyzed using the Athena and Artemis programs. The Fourier transforms of the background-subtracted data were obtained using a Hanning window in the  $k$  range of 3–12 Å with a  $dk$  of 1 Å<sup>-1</sup>.

The particle distribution of the catalysts was analyzed by scanning transmission electron microscopy (STEM) coupled with energy-dispersive X-ray spectroscopy (EDS). Images were collected using a Talos F200X microscope (Talos, USA) operated at 200 keV<sup>1-3</sup>.

The Bruker ALPHA-T Infrared Spectrometer (IR) and the Attenuated Total Reflectance (ATR) method of the Bruker ALPHA-P Infrared Spectrometer were used to analyze the sample. The ALPHA-T instrument had a resolution of 8 cm<sup>-1</sup>, a scan time of 64 scans, and a range of 4000

$\text{cm}^{-1}$  to  $400 \text{ cm}^{-1}$ . Similarly, the ALPHA-P instrument also had a resolution of  $8 \text{ cm}^{-1}$ , a scan time of 64 scans, and a range of  $4000 \text{ cm}^{-1}$  to  $400 \text{ cm}^{-1}$ .

## 2. Results & Discussion

### 2.1. Characterization Results

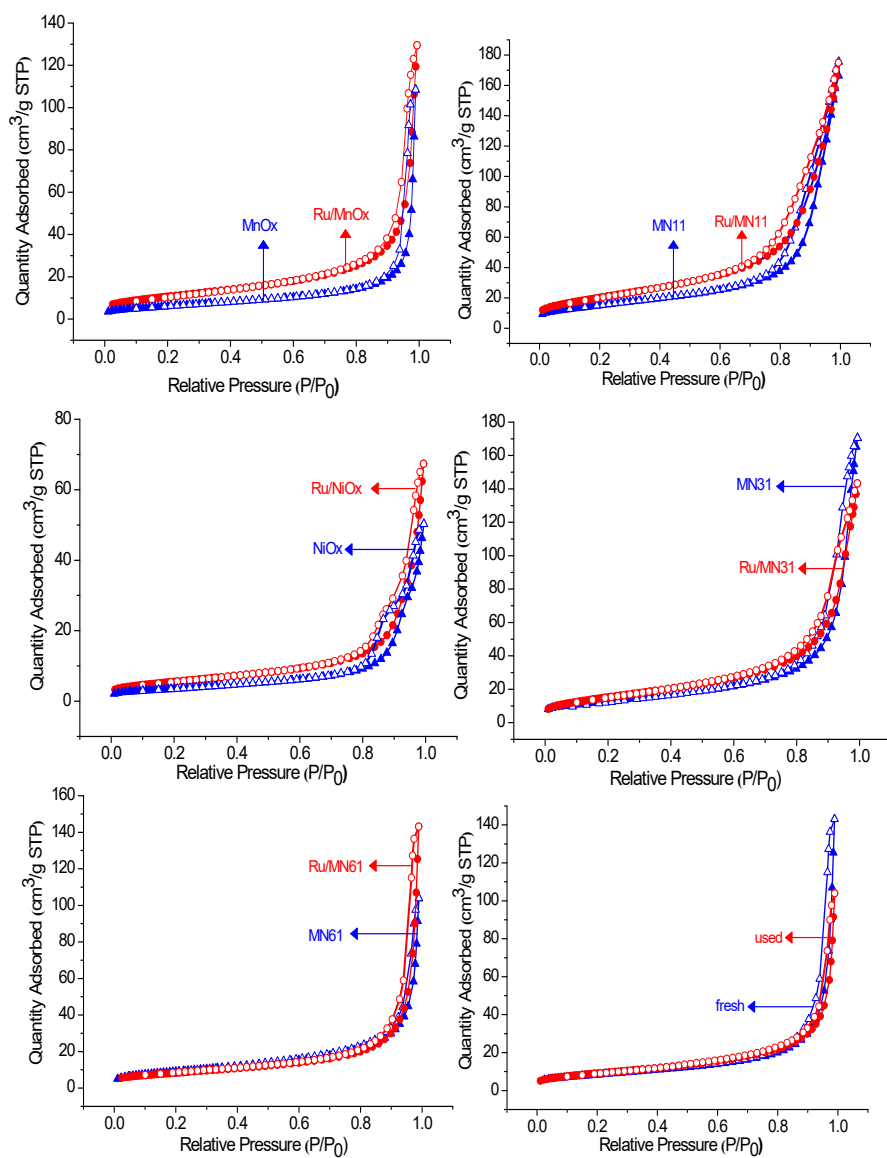

Fig. S1.  $\text{N}_2$ -isotherms of the catalysts

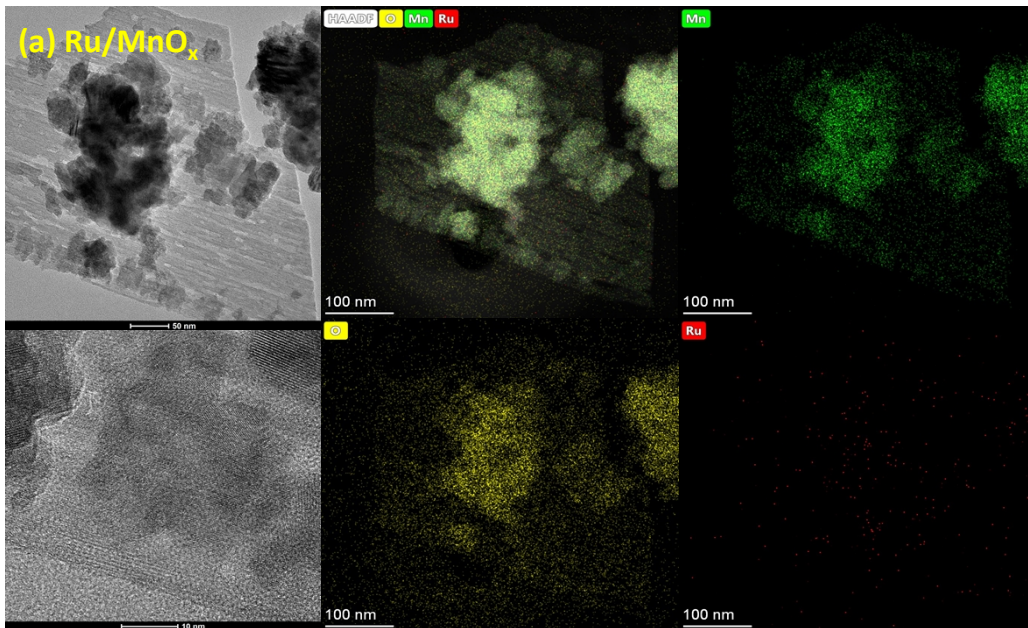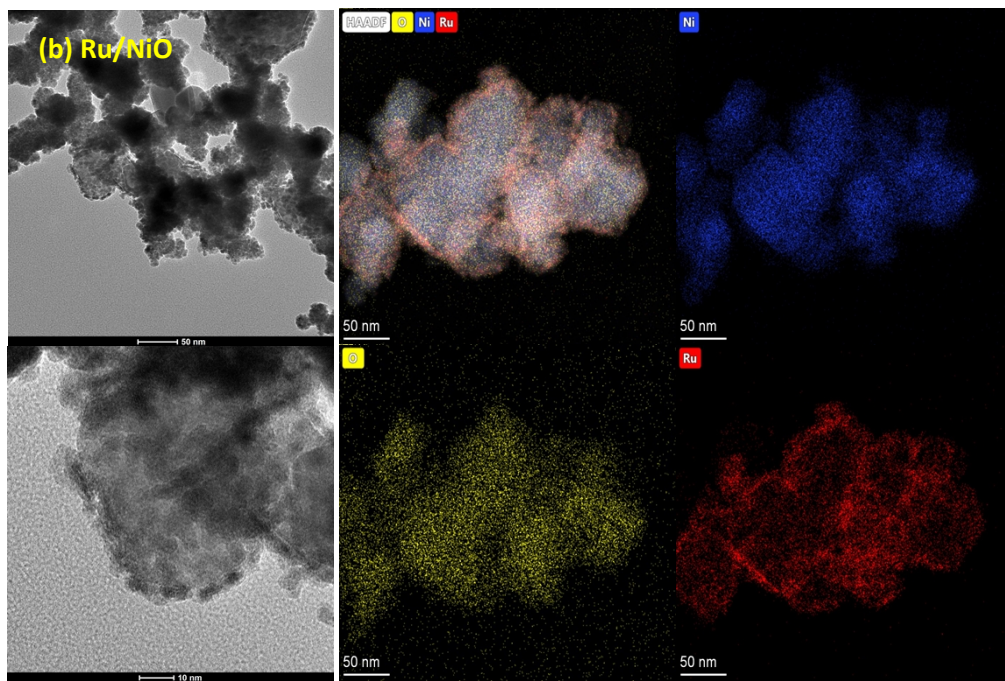

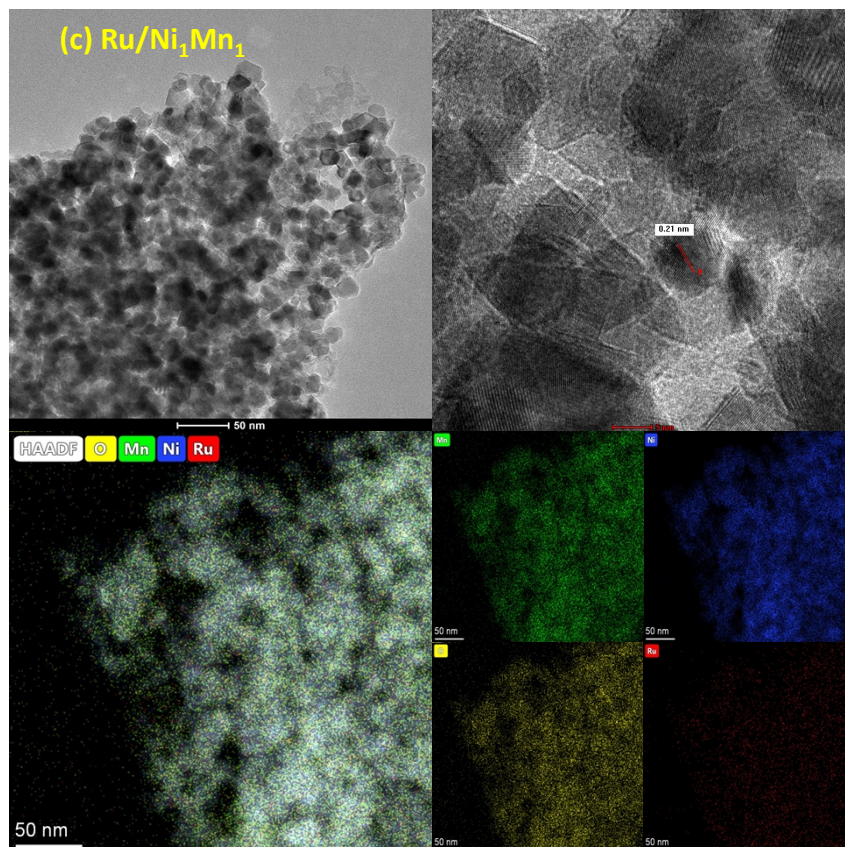

Fig. S2. TEM images and elemental distribution of (a) Ru/MnO<sub>x</sub>, (b) Ru/NiO, and (c) Ru/Ni<sub>1</sub>Mn<sub>1</sub>

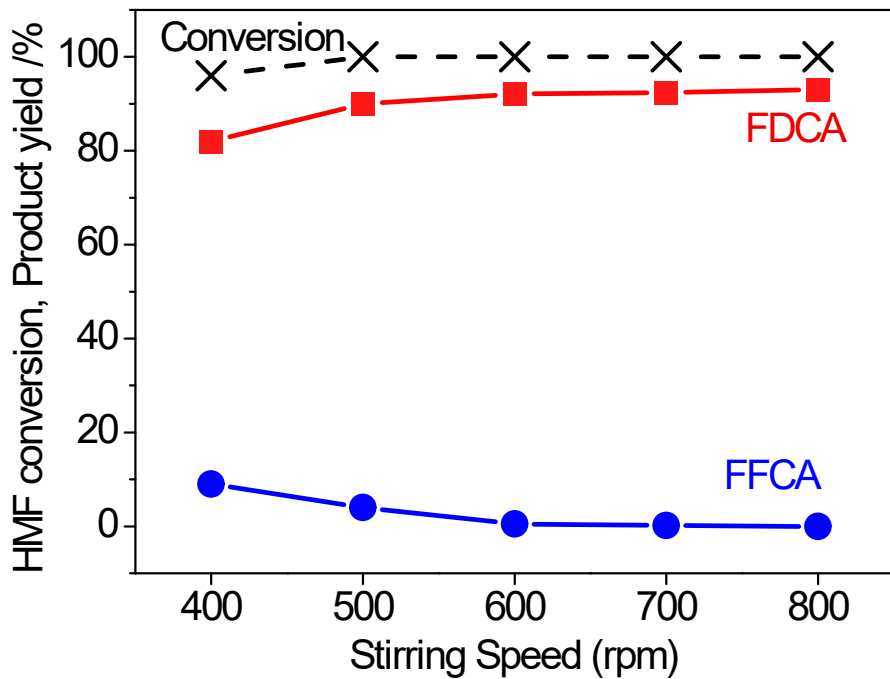

Fig. S3. Effect of stirring speed on FDCA formation. Reaction conditions: 5 wt.% HMF; water: acetone (10 g) ratio, 70:30; catalyst/HMF wt. ratio, 1.43; O<sub>2</sub> pressure, 10 bar; temperature, 110 °C; reaction time, 12 h.

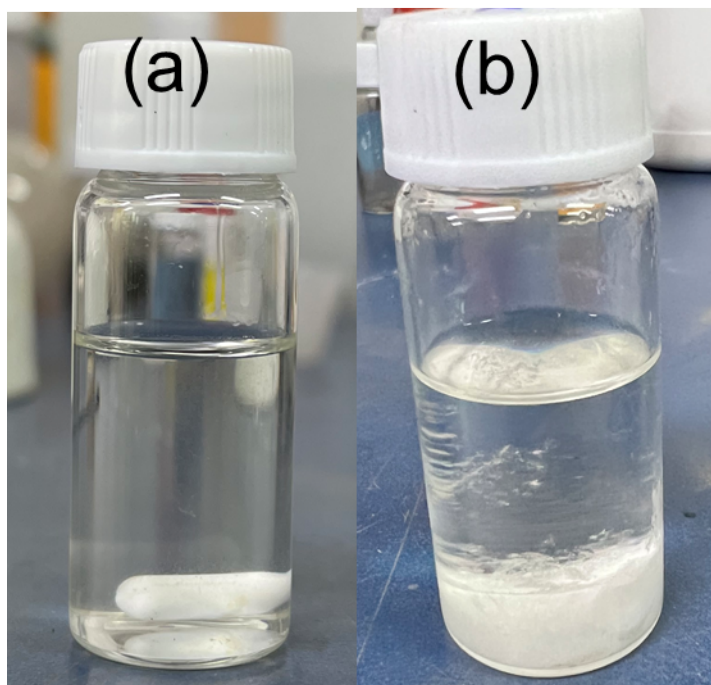

Fig. S4. (a) FDCA solubility at 110 °C, (b) Recrystallization of FDCA at 20 °C.

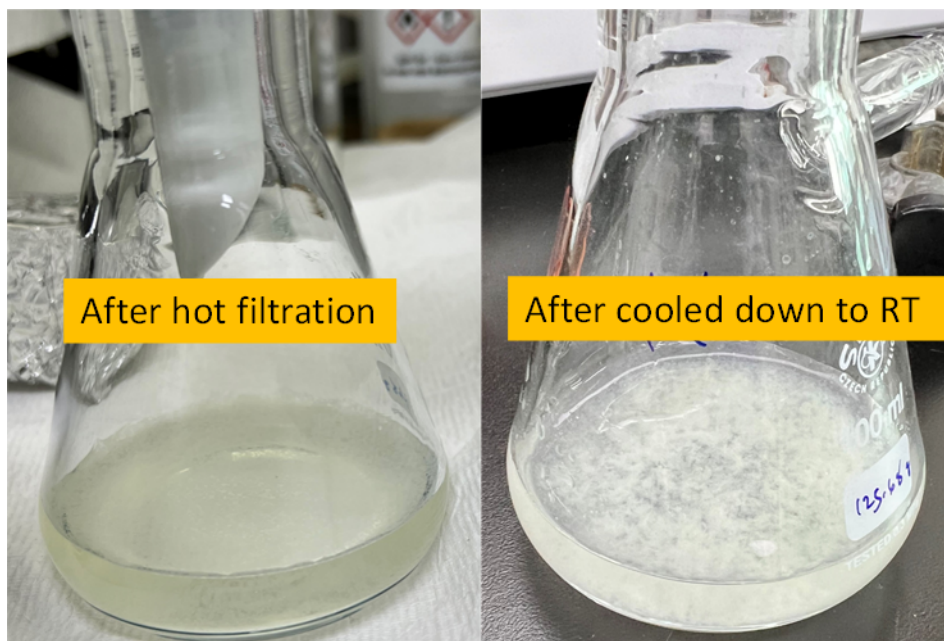

Fig. S5. Hot filtration of reaction mixture and cooled filtrate.



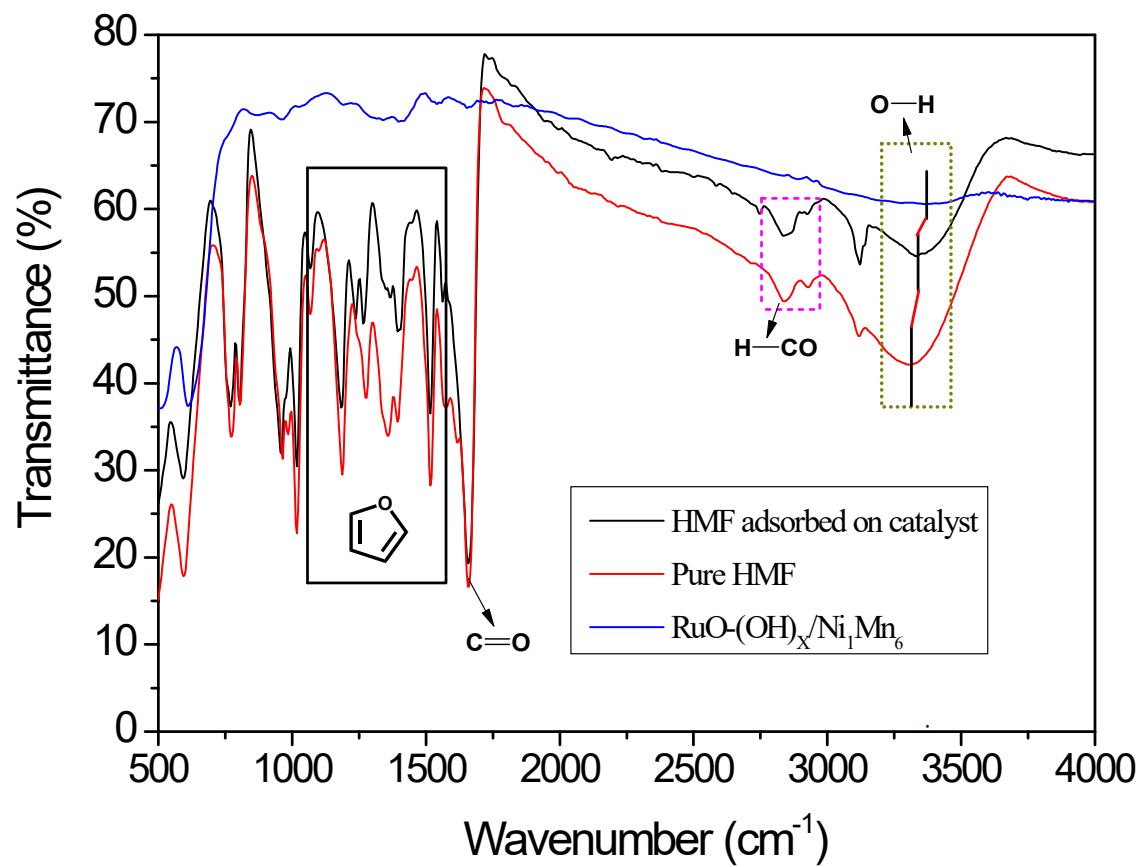

Fig. S6. FT-IR spectra of Catalyst, HMF and after adsorption on catalyst.

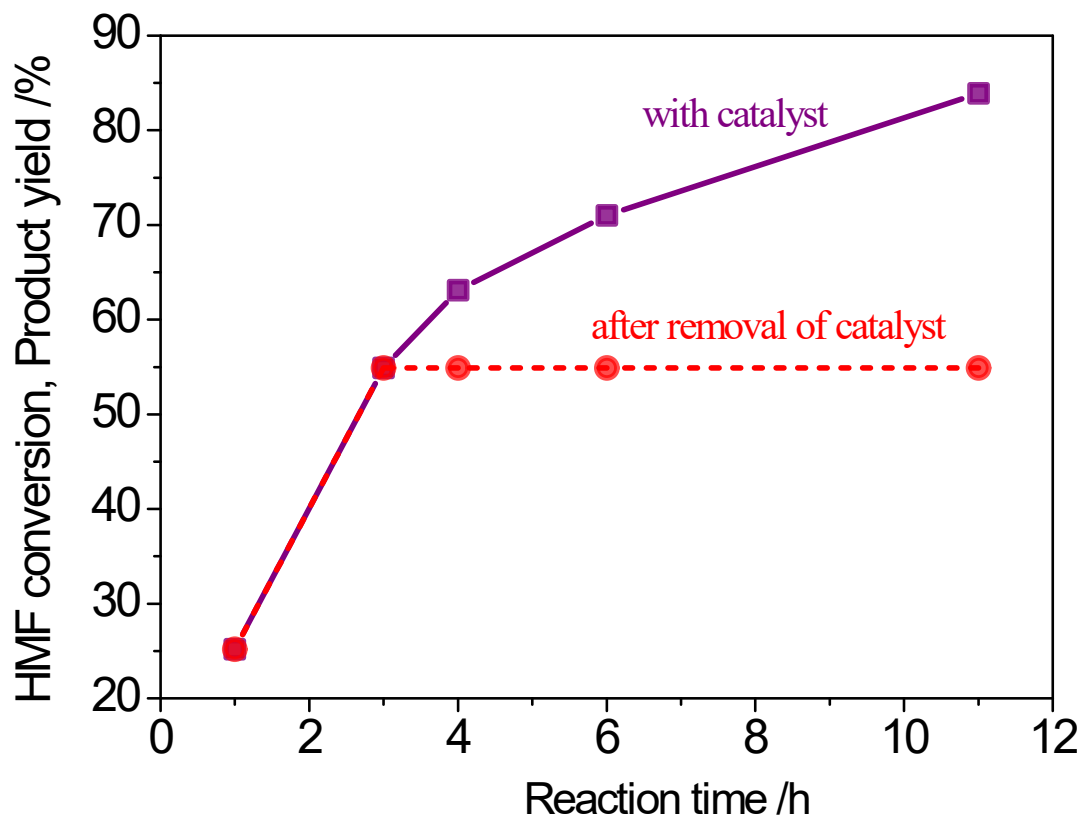

Fig. S7. Hot filtration test. Fig. S3. Effect of stirring speed on FDCA formation. Reaction conditions: 5 wt.% HMF; water: acetone (10 g) ratio, 70:30; catalyst/HMF wt. ratio, 1.43; O<sub>2</sub> pressure, 10 bar; temperature, 110 °C.

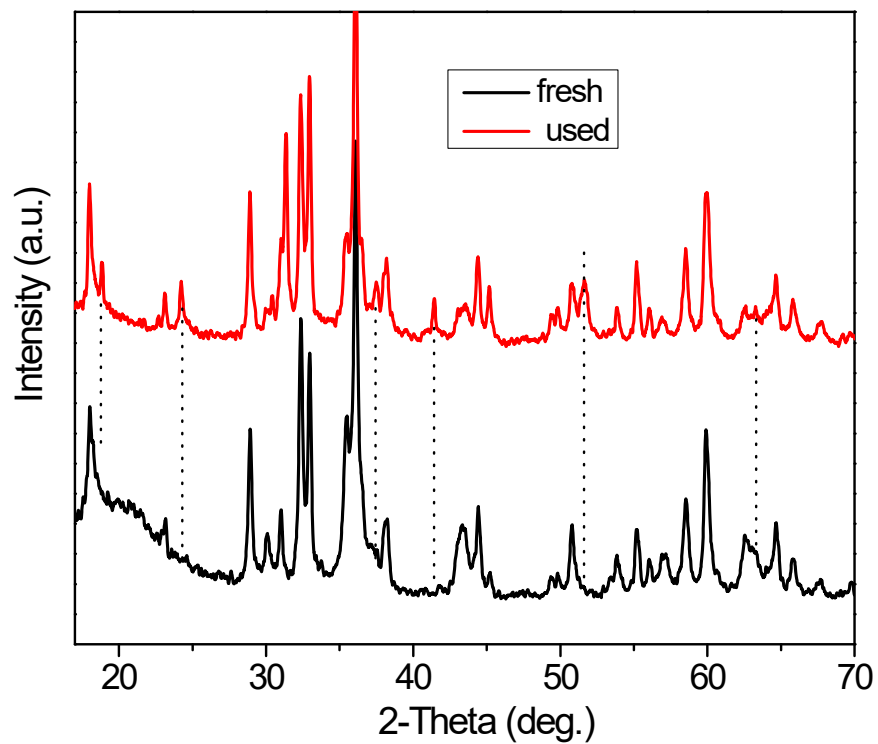

Fig. S8. XRD patterns of Ru/Ni<sub>1</sub>Mn<sub>6</sub> catalysts.

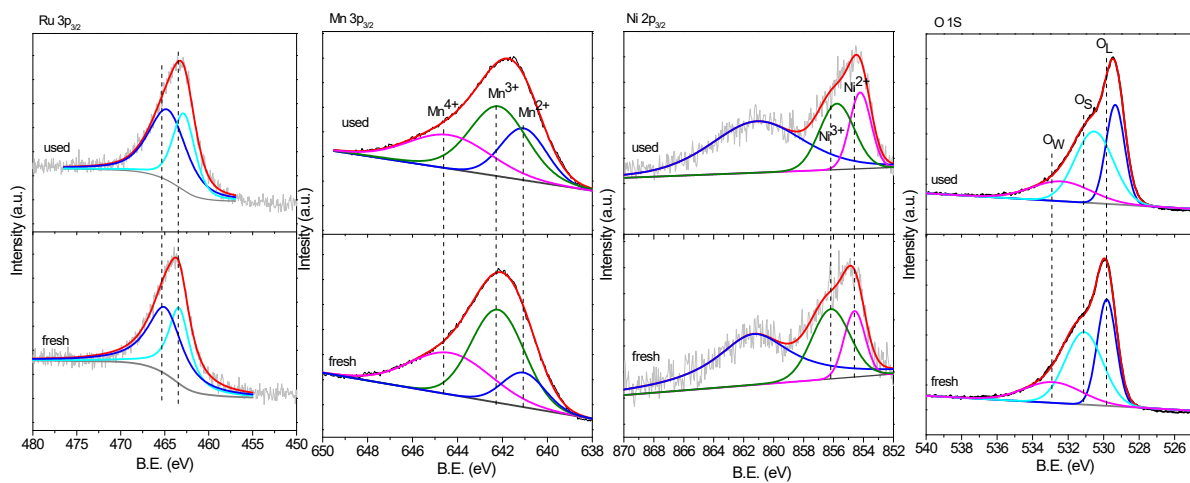

Fig. S9. XPS curves of fresh and used Ru/Ni<sub>1</sub>Mn<sub>6</sub> catalysts.

Table S1. N<sub>2</sub>-sorption results of the catalysts

| Catalyst         | S.A. (m <sup>2</sup> /g) | VP (cm <sup>3</sup> /g) | Pore Diameter (nm) |
|------------------|--------------------------|-------------------------|--------------------|
| MnO <sub>x</sub> | 22.43                    | 0.167                   | 292.55             |
| MN11             | 54.43                    | 0.27                    | 183.8              |
| MN31             | 46.62                    | 0.262                   | 205.34             |
| MN61             | 30.10                    | 0.220                   | 283.61             |
| MN81             | 23.49                    | 0.173                   | 298.06             |
| NiO              | 12.53                    | 0.077                   | 199.77             |

Table S2. Quantity of O<sub>2</sub>-desorbed over different catalysts by O<sub>2</sub>-TPD

| Catalyst                           | O <sub>C</sub> (mmol/g) | O <sub>L</sub> (mmol/g) | O <sub>bulk</sub> (mmol/g) |
|------------------------------------|-------------------------|-------------------------|----------------------------|
| NiO                                | 0.26                    | 0.21                    | 0                          |
| Ni <sub>1</sub> Mn <sub>1</sub>    | 0.65                    | 2.83                    | 1.67                       |
| Ni <sub>1</sub> Mn <sub>1</sub>    | 0.47                    | 6.04                    | 0                          |
| Ni <sub>1</sub> Mn <sub>1</sub>    | 0.14                    | 3.49                    | 2.06                       |
| MnOx                               | 0.14                    | 3.30                    | 2.11                       |
| Ru/NiO                             | 0.54                    | 0.09                    | 0                          |
| Ru/Ni <sub>1</sub> Mn <sub>1</sub> | 2.40                    | 1.14                    | 2.21                       |
| Ru/Ni <sub>1</sub> Mn <sub>3</sub> | 2.98                    | 1.55                    | 0.03                       |
| Ru/Ni <sub>1</sub> Mn <sub>6</sub> | 0.63                    | 3.96                    | 1.66                       |
| Ru/MnOx                            | 0.67                    | 3.44                    | 1.11                       |

Table S3. Ru 3P<sub>3/2</sub> XPS B.Es of the catalysts

| Catalyst     | B.E. (eV)       |                  |                     |                         |
|--------------|-----------------|------------------|---------------------|-------------------------|
|              | Ru <sup>0</sup> | RuO <sub>2</sub> | Ru(OH) <sub>3</sub> | Ru(OH) <sub>3</sub> (%) |
| Ru/NiO       | 462.35          | 463.81           | 465.59              | 45.31                   |
| Ru/NM11      | 461.92          | 463.62           | 465.56              | 24.78                   |
| Ru/NM13      | 461.51          | 462.89           | 465.01              | 29.52                   |
| Ru/NM16      | -               | 462.77           | 464.74              | 53.27                   |
| Ru/MnOx      | -               | 462.65           | 465.20              | 51.32                   |
| Ru/NM16-used | -               | 462.71           | 464.65              | 52.76                   |

Table S4. Mn 3P<sub>3/2</sub> XPS B.Es of the catalysts

| Catalyst     | Mn <sup>2+</sup> |       | Mn <sup>3+</sup> |       | Mn <sup>4+</sup> |       |
|--------------|------------------|-------|------------------|-------|------------------|-------|
|              | B.E. (eV)        | %     | B.E. (eV)        | %     | B.E. (eV)        | %     |
| Ru/NM11      | 640.35           | 28.07 | 642              | 44.02 | 644.45           | 27.90 |
| Ru/NM13      | 641.15           | 24.27 | 642.23           | 41.02 | 644.44           | 32.7  |
| Ru/NM16      | 641.06           | 14.95 | 642.2            | 50.30 | 644.32           | 34.74 |
| Ru/MnOx      | 641.05           | 16.72 | 642.23           | 44.78 | 644.25           | 38.49 |
| Ru/NM16-used | 641.06           | 25.43 | 642.18           | 45.78 | 644.36           | 29.17 |

Table S5. Ni 2P<sub>3/2</sub> XPS B.Es of the catalysts

| Catalyst     | Ni <sup>2+</sup> |       | Ni <sup>3+</sup> |       |
|--------------|------------------|-------|------------------|-------|
|              | B.E. (eV)        | %     | B.E. (eV)        | %     |
| Ru/NiO       | 854.95           | 52.50 | 856.65           | 47.5  |
| Ru/NM11      | 854.43           | 47.61 | 856.21           | 52.39 |
| Ru/NM13      | 854.46           | 34.00 | 856.06           | 66    |
| Ru/NM16      | 854.60           | 33.63 | 856.18           | 66.27 |
| Ru/NM16-used | 854.21           | 41.42 | 855.77           | 58.58 |

Table S6. O1S XPS B.Es of the catalysts

| Catalyst     | B.E. (eV)      |                |                  |                    |
|--------------|----------------|----------------|------------------|--------------------|
|              | O <sub>L</sub> | O <sub>S</sub> | O <sub>H2O</sub> | O <sub>L</sub> (%) |
| RuNiO        | 529.81         | 531.10         | 532.68           | 39.31              |
| Ru/NM11      | 529.56         | 530.92         | 532.74           | 24.78              |
| Ru/NM13      | 529.44         | 530.75         | 532.48           | 29.52              |
| Ru/NM16      | 529.82         | 531.10         | 532.85           | 43.27              |
| Ru/MnOx      | 529.51         | 530.72         | 532.59           | 41.32              |
| Ru/NM16-used | 529.35         | 530.53         | 532.38           | 43.09              |

Table S7. Catalytic activity of the NaBH<sub>4</sub> untreated RuO-(OH) catalysts

| Catalyst            | HMF<br>Conv. (%) | FDCA<br>Yield (%) | FFCA<br>Yield (%) | DFF<br>Yield (%) | HMFCFA<br>Yield (%) |
|---------------------|------------------|-------------------|-------------------|------------------|---------------------|
| Ru/MnO <sub>x</sub> | 100              | 71                | 12                | 8                | 1                   |
| Ru/Mn-Ni11          | 100              | 61                | 13                | 14               | 2                   |
| Ru/Mn-Ni-31         | 100              | 72                | 8                 | 6                | 1                   |
| Ru/Mn-Ni61          | 100              | 81                | 6                 | 3                | 0                   |
| Ru/NiO              | 74               | 56                | 9                 | 3                | 0                   |

Reaction Conditions: Oxidation of HMF over different Ni-manganite catalysts. Reaction conditions: 5 wt.% HMF; water: acetone (10 g) ratio, 70:30; catalyst/HMF wt. ratio, 1.43; O<sub>2</sub> pressure, 10 bar; temperature, 110 °C; reaction time, 12 h.

Table S8. ICP analysis of the fresh and used catalyst

| Catalyst                           | Condition | Mn<br>(ppm) | Ni<br>(ppm) | Ru<br>(ppm) |
|------------------------------------|-----------|-------------|-------------|-------------|
| Ru/Ni <sub>1</sub> Mn <sub>6</sub> | fresh     | 10.74       | 1.88        | 0.656       |
| Ru/Ni <sub>1</sub> Mn <sub>6</sub> | spent     | 9.96        | 1.80        | 0.650       |

20 mg/L sample used for the analysis

## References

1. M. J. Hidajat, I. T. Ghampson, G. N. Yun, D. W. Hwang, *Chem. Eng. J.*, 2023, **1**, 141912
2. M. J. Hidajat, O. Kwon, H. Park, J. Han, G. N. Yun, D. W. Hwang, *Green Chem.*, 2022, **24**, 7556-7573.
3. P. Manjunathan, P. P. Upare, Maeum Lee, D. W. Hwang, *Catal. Sci. Technol.*, 2021, **11**, 5816-5826.
